# Supplementary material for: d-allulose Ameliorates Metabolic Dysfunction in C57BL/KsJ-db/db Mice
Source: PubMed Central journal article supplement (PMC7465492; doi:10.3390/molecules25163656), 2020-08-11
Supplement: molecules-25-03656-s001.pdf [file molecules-25-03656-s001.pdf]

**Supplementary Table S1.** Composition of experimental diets (% of diet, w/w)

| <b>Ingredient(g)</b>                  | <b>ND</b> | <b>ER</b> | <b>AL</b> |
|---------------------------------------|-----------|-----------|-----------|
| Casein                                | 200.00    | 200.00    | 200.00    |
| D,L-methionine                        | 3.00      | 3.00      | 3.00      |
| Corn starch                           | 150.00    | 150.00    | 150.00    |
| Sucrose                               | 499.99    | 449.99    | 449.99    |
| Cellulose powder                      | 50.00     | 50.00     | 50.00     |
| Corn oil                              | 50.00     | 50.00     | 50.00     |
| Mineral mixture (AIN-76) <sup>1</sup> | 35.00     | 35.00     | 35.00     |
| Vitamin mix (AIN-76) <sup>2</sup>     | 10.00     | 10.00     | 10.00     |
| Choline bitartrate                    | 2.00      | 2.00      | 2.00      |
| tert-Butylhydroquinone                | 0.01      | 0.01      | 0.01      |
| Erythritol                            | -         | 50.00     | -         |
| Allulose                              | -         | -         | 50.00     |
| Total(g)                              | 1000.00   | 1000.00   | 1000.00   |
| Calorie(kcal/g)                       | 3.902     | 3.702     | 3.702     |

<sup>1</sup> AIN-76 mineral mixture (Harlan Teklad Co., Madison, WI, USA). <sup>2</sup> AIN-76 vitamin mixture (Harlan Teklad Co., Madison, WI, USA). ND: normal diet; ER: erythritol; AL: allulose.

**Supplementary Table S2.** Primer sequences used for RT-qPCR validation of microarray data

| Gene           | Primer Direction | Sequence                       |
|----------------|------------------|--------------------------------|
| IRS1           | Forward          | 5'-GGTACCTACAAGTGGGTGAA-3'     |
|                | Reverse          | 5'-AGATGGTGAAAAGGGAAGAT-3'     |
| PI3Kca         | Forward          | 5'-GGGTTTTCTGTCCCCTCTGA-3'     |
|                | Reverse          | 5'-TGATGTCTGGGTTCTCCCAA-3'     |
| Akt2           | Forward          | 5'-ACGTGGTGAATACATCAAGACC-3'   |
|                | Reverse          | 5'-GCTACAGAGAAATTGTTTCAGGGG-3' |
| GLUT4          | Forward          | 5'-CTGAGAACTTAACTGCTGAAG-3'    |
|                | Reverse          | 5'-AGGAGTTTGTGTTGGTGTATTAC-3'  |
| CPT2           | Forward          | 5'-GCCTGCTGTTGCGTGAAG-3'       |
|                | Reverse          | 5'-TGGTGGGTACGATGCTGTGC-3'     |
| PGC-1 $\alpha$ | Forward          | 5'-AAGTGTGGAAGCTCTCTGGAAG-3'   |
|                | Reverse          | 5'-GGGTTATCTTGGTTGGCTTTATG-3'  |
| PGC-1 $\beta$  | Forward          | 5'-GGTCCCTGGCTGACATCCAC-3'     |
|                | Reverse          | 5'-GGCACATCGAGGGCAGAG-3'       |
| GAPDH          | Forward          | 5'-ACAATGAATACGGCTACAGCAACA-3' |
|                | Reverse          | 5'-GGTGGTCCAGGGTTTCTTACTCC-3'  |

IRS1, insulin receptor substrate 1; PI3Kca, phosphatidylinositol-4,5-bisphosphate 3-kinase catalytic subunit alpha; Akt2, AKT serine/threonine kinase 2; GLUT4, facilitated glucose transporter 4; CPT2, carnitine palmitoyl-CoA carboxylase 2; PGC-1 $\alpha$  and PGC-1 $\beta$ , peroxisome proliferator-activated receptor gamma coactivator 1-alpha and 1-beta; GAPDH, glyceraldehyde-3-phosphate dehydrogenase.

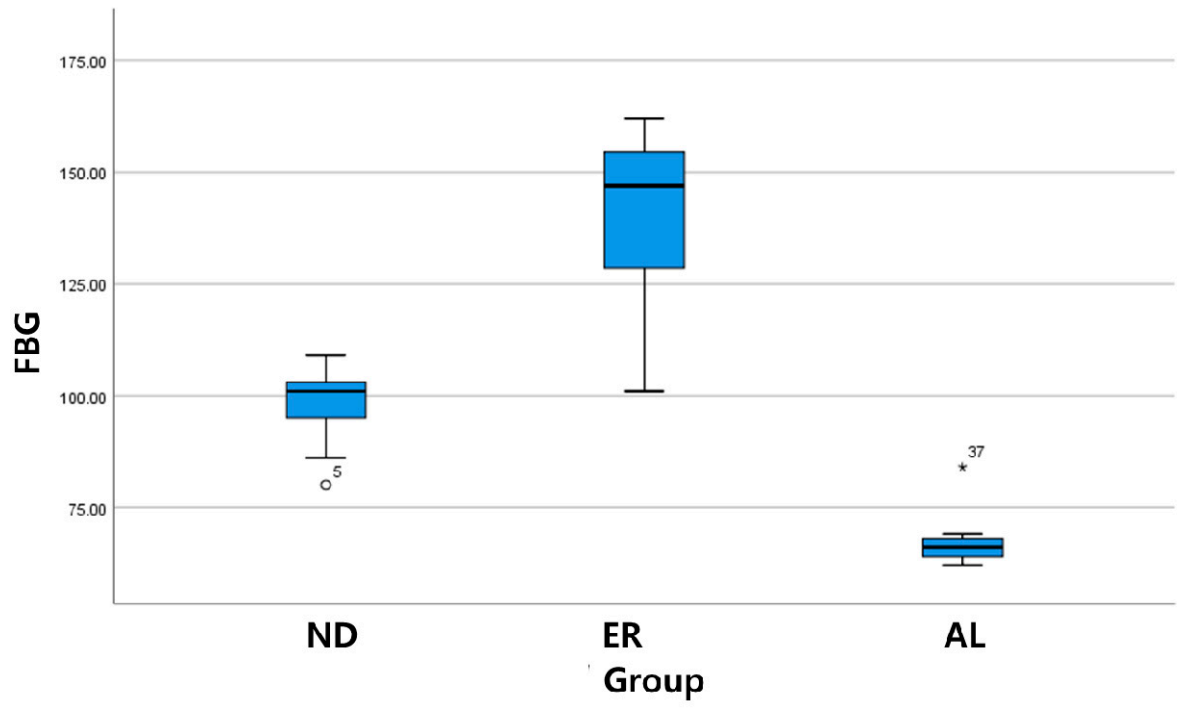

Supplementary figure S1
